# Supplementary material for: Improved activity and stability of dealloyed bimodal nanoporous PtCo catalysts for CO oxidation
Source: Royal Society of Chemistry journal article supplement (doi:10.1039/c6ra04818h), 2016-01-01
Supplement: c6ra04818h1.pdf [file c6ra04818h1.pdf]

# Supporting information

## Improved activity and stability of dealloyed bimodal nanoporous PtCo catalysts for CO oxidation

Dongwei Li,<sup>[a,b]</sup> Hui Wang,<sup>[c]</sup> Chunying Shi<sup>[b]</sup> and Xiaohong Xu<sup>\*[b]</sup>

<sup>a</sup> State Key Laboratory of Chemical Resource Engineering, Beijing University of Chemical Technology,  
Beijing 100029, China

<sup>b</sup> School of Chemistry and Chemical Engineering, Shandong University, Jinan 250100, China

<sup>c</sup> Environmental Protection Administration of Linyi, Linyi 276000, China

\* Corresponding author:

Tel: +86-531-88361067

Fax: +86-531-88364464

Email address: xhxu@sdu.edu.cn (X.H. Xu)

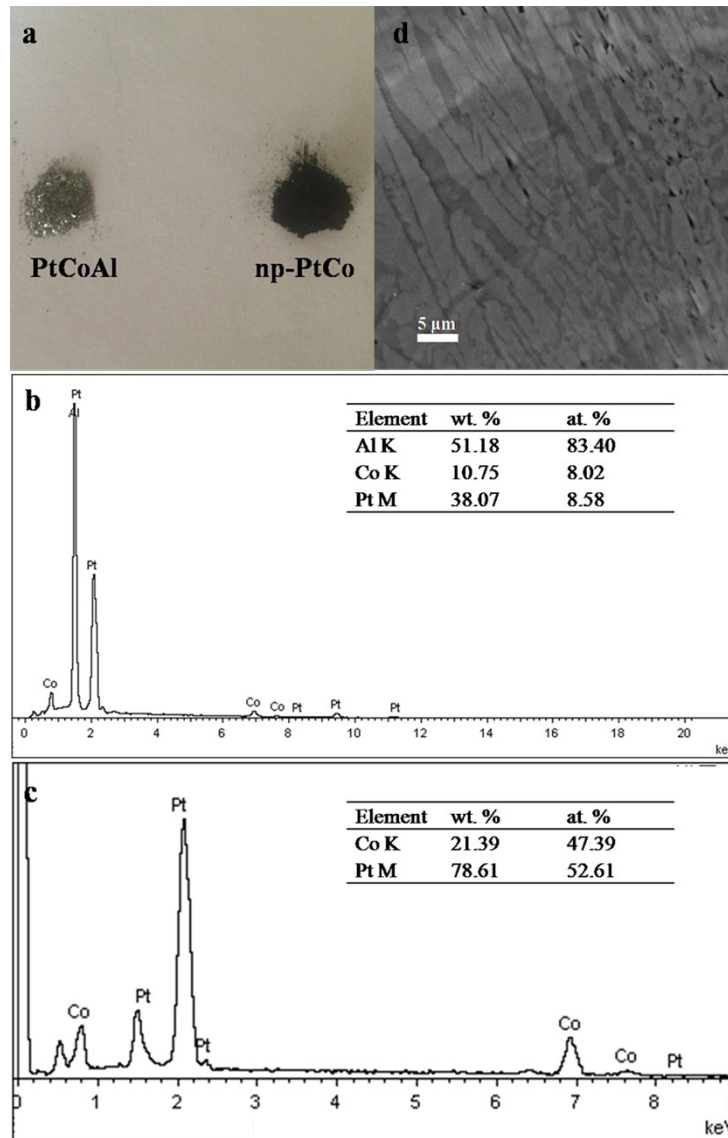

Fig. S1. (a) Macrograph of PtCoAl precursor and as-dealloyed np-PtCo. (b) EDS analysis of PtCoAl precursor. (c) EDS analysis of as-dealloyed PtCo. (d) SEM image of PtCoAl precursor.

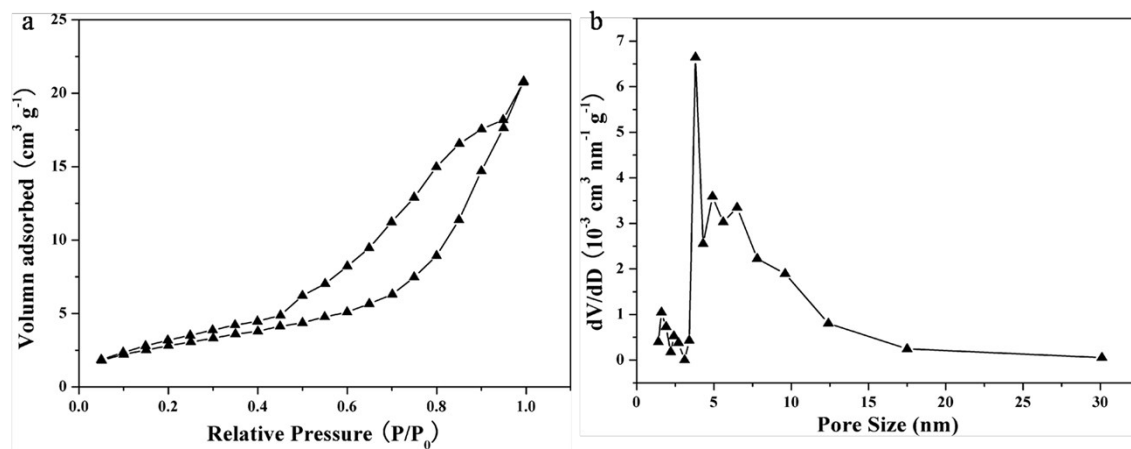

Fig. S2. (a) N<sub>2</sub> adsorption/desorption isotherm of the obtained np-PtCo. (b) Pore-size distribution obtained using the BJH method.

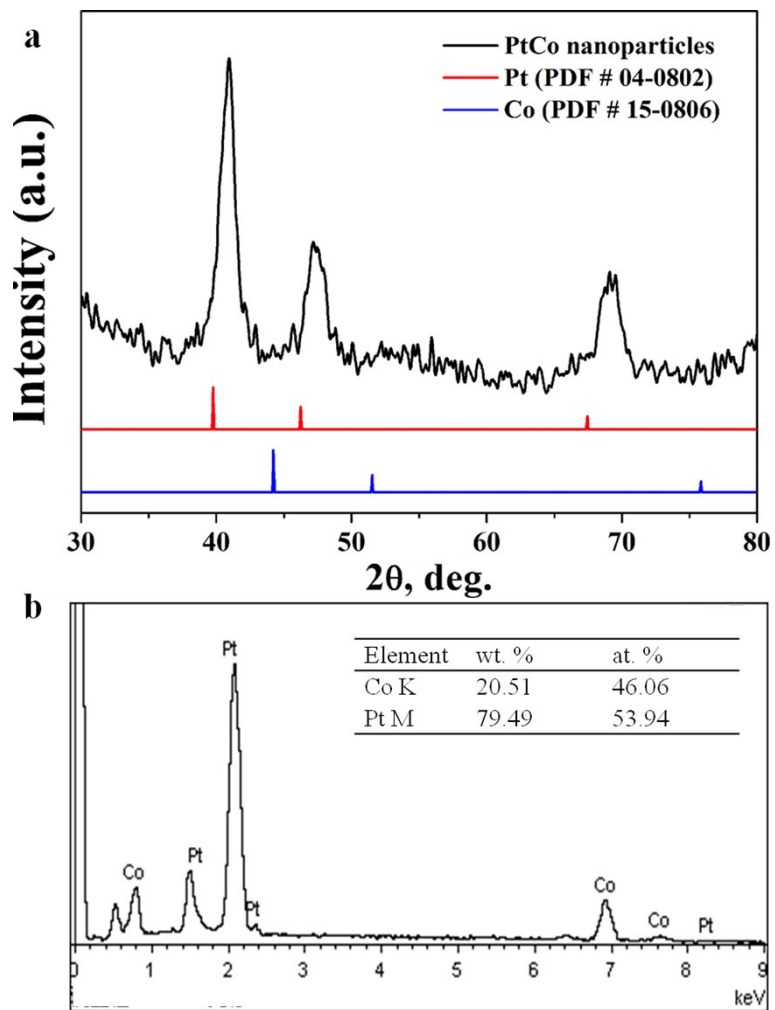

Fig. s3. (a) XRD patterns of as-prepared PtCo nanoparticles. (b) EDS analysis of as-prepared PtCo nanoparticles.

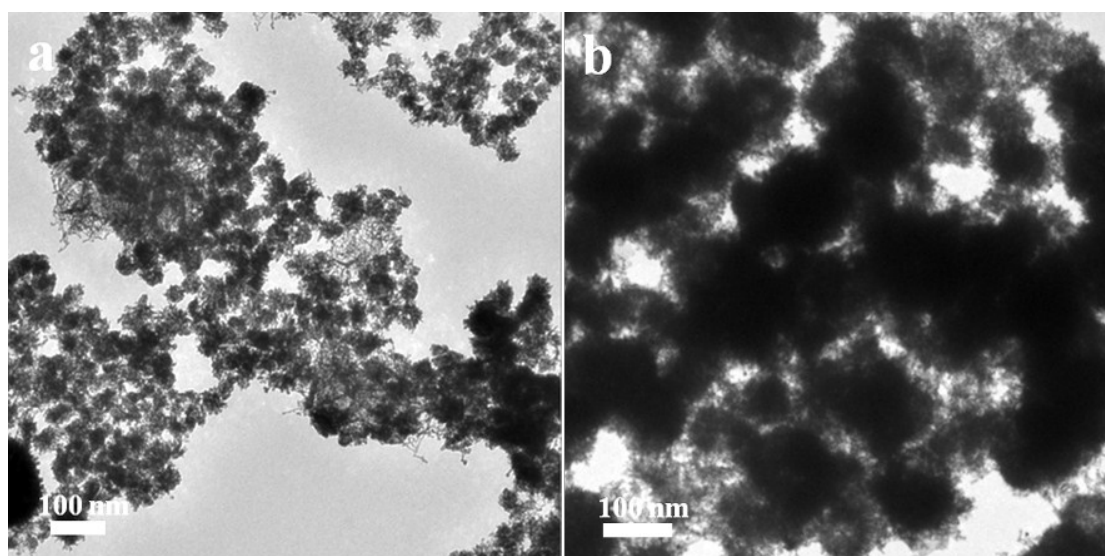

Fig. s4. TEM images of as-prepared PtCo nanoparticles before (a) and after (b) the catalytic reaction.

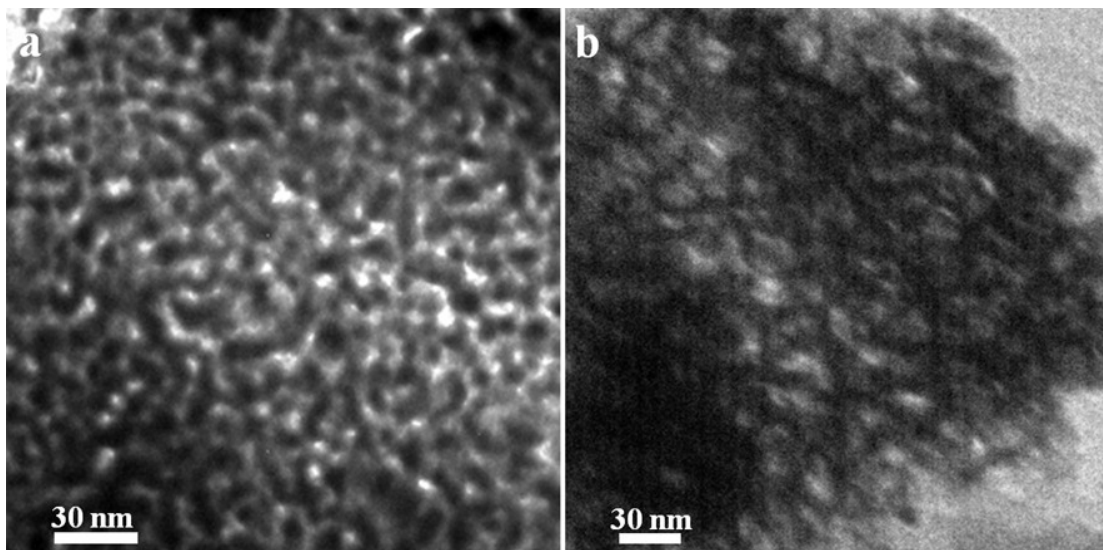

Fig. s5. TEM images of np-Pt before (a) and after (b) the catalytic reaction.

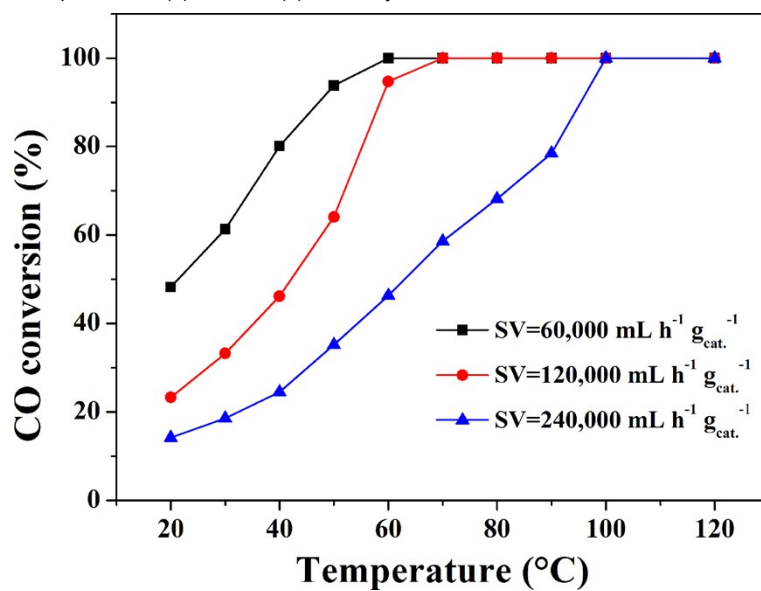

Fig. s6. The influence of space velocity on CO conversion over np-PtCo with 1% CO, 10% O<sub>2</sub>, and N<sub>2</sub> balance at space velocity of 60,000 (■), 120,000 (●), and 240,000 mL h<sup>-1</sup> g<sub>cat.</sub><sup>-1</sup> (▲), respectively.
